# Supplementary material for: Terpenoids: shape and non-covalent interactions. The rotational spectrum of cis-verbenol and its 1 : 1 water complex
Source: Royal Society of Chemistry journal article supplement (doi:10.1039/d0cp00086h), 2020-01-01
Supplement: d0cp00086h1.pdf [file d0cp00086h1.pdf]

Terpenoids: shape and non-covalent interactions. The rotational  
spectrum of *cis*-verbenol and its 1:1 water complex.  
Supporting Information

Susana Blanco \*      Juan Carlos López †      Assimo Maris ‡

List of Tables

|    |                                                                                                                                                                                                             |    |
|----|-------------------------------------------------------------------------------------------------------------------------------------------------------------------------------------------------------------|----|
| 1  | Experimental transition frequencies of <i>anti</i> , <i>cis</i> -verbenol. . . . .                                                                                                                          | 3  |
| 2  | Experimental transition frequencies and rotational constants for <sup>13</sup> C1 isotopologue of <i>anti</i> , <i>cis</i> -verbenol, and substitution coordinates of the substituted carbon atom. . . . .  | 11 |
| 3  | Experimental transition frequencies and rotational constants for <sup>13</sup> C2 isotopologue of <i>anti</i> , <i>cis</i> -verbenol, and substitution coordinates of the substituted carbon atom. . . . .  | 12 |
| 4  | Experimental transition frequencies and rotational constants for <sup>13</sup> C3 isotopologue of <i>anti</i> , <i>cis</i> -verbenol, and substitution coordinates of the substituted carbon atom. . . . .  | 13 |
| 5  | Experimental transition frequencies and rotational constants for <sup>13</sup> C4 isotopologue of <i>anti</i> , <i>cis</i> -verbenol, and substitution coordinates of the substituted carbon atom. . . . .  | 14 |
| 6  | Experimental transition frequencies and rotational constants for <sup>13</sup> C5 isotopologue of <i>anti</i> , <i>cis</i> -verbenol, and substitution coordinates of the substituted carbon atom. . . . .  | 15 |
| 7  | Experimental transition frequencies and rotational constants for <sup>13</sup> C6 isotopologue of <i>anti</i> , <i>cis</i> -verbenol, and substitution coordinates of the substituted carbon atom. . . . .  | 16 |
| 8  | Experimental transition frequencies and rotational constants for <sup>13</sup> C7 isotopologue of <i>anti</i> , <i>cis</i> -verbenol, and substitution coordinates of the substituted carbon atom. . . . .  | 17 |
| 9  | Experimental transition frequencies and rotational constants for <sup>13</sup> C8 isotopologue of <i>anti</i> , <i>cis</i> -verbenol, and substitution coordinates of the substituted carbon atom. . . . .  | 18 |
| 10 | Experimental transition frequencies and rotational constants for <sup>13</sup> C9 isotopologue of <i>anti</i> , <i>cis</i> -verbenol, and substitution coordinates of the substituted carbon atom. . . . .  | 19 |
| 11 | Experimental transition frequencies and rotational constants for <sup>13</sup> C10 isotopologue of <i>anti</i> , <i>cis</i> -verbenol, and substitution coordinates of the substituted carbon atom. . . . . | 20 |
| 12 | Experimental transition frequencies and rotational constants for OD isotopologue of <i>anti</i> , <i>cis</i> -verbenol, and substitution coordinates of the substituted carbon atom. . . . .                | 21 |
| 13 | Comparison between the theoretical MP2/6-311++G(d,p) equilibrium coordinates and experimental Kraitchman's substitution coordinates of <i>anti</i> , <i>cis</i> -verbenol. . . . .                          | 22 |
| 14 | Theoretical MP2/6-311++G(d,p) equilibrium structure of the three conformers of <i>cis</i> -verbenol in the principal axis system of coordinates. . . . .                                                    | 23 |
| 15 | Experimental transition frequencies of <i>anti</i> , <i>s-cis</i> -verbenol-water molecular complex. . . . .                                                                                                | 25 |
| 16 | Theoretical MP2/6-311++G(d,p) equilibrium structure of the three conformers of <i>anti,cis</i> -verbenol ···water complex in the principal axis system of coordinates. . . . .                              | 26 |
| 17 | Theoretical MP2/6-311++G(d,p) equilibrium structure of the two conformers of <i>gauche</i> , <i>cis</i> -verbenol ···water complex in the principal axis system of coordinates. . . . .                     | 27 |
| 18 | Theoretical MP2/6-311++G(d,p) equilibrium structure of the two conformers of <i>gauche'</i> , <i>cis</i> -verbenol ···water complex in the principal axis system of coordinates. . . . .                    | 28 |

\*Departamento de Química Física y Química Inorgánica, Universidad de Valladolid, Valladolid 47011, Spain.

†Departamento de Química Física y Química Inorgánica, Universidad de Valladolid, Valladolid 47011, Spain.

‡Dipartimento di Chimica G. Ciamician, Università di Bologna, via Selmi 2, Bologna 40126, Italy.

## List of Figures

|   |                                                                                                                              |    |
|---|------------------------------------------------------------------------------------------------------------------------------|----|
| 1 | Sketch and numbering of the atoms of the <i>anti</i> conformer of <i>cis</i> -verbenol, as given in Table 14. . . . .        | 23 |
| 2 | Sketch and numbering of the atoms of the <i>gauche'</i> conformer of <i>cis</i> -verbenol, as given in Table 14. . . . .     | 24 |
| 3 | Sketch and numbering of the atoms of the <i>gauche</i> conformer of <i>cis</i> -verbenol, as given in Table 14. . . . .      | 24 |
| 4 | Sketch and numbering of the atoms of the observed water complex of <i>cis</i> -verbenol (AD1), as given in Table 16. . . . . | 25 |

Table 1: Experimental transition frequencies of *anti*, *cis*-verbenol.

| $J'$ | $K_a'$ | $K_c'$ | $J$ | $K_a$ | $K_c$ | $\nu_{obs.}$ [MHz] | <i>obs.-calc.</i> |
|------|--------|--------|-----|-------|-------|--------------------|-------------------|
| 1    | 1      | 1      | 0   | 0     | 0     | 2218.7538          | -0.0016           |
| 1    | 1      | 0      | 0   | 0     | 0     | 2494.8361          | 0.0027            |
| 2    | 0      | 2      | 1   | 1     | 1     | 3880.2612          | -0.0018           |
| 2    | 1      | 2      | 1   | 0     | 1     | 4037.4797          | -0.0013           |
| 2    | 2      | 0      | 1   | 1     | 1     | 5299.0085          | -0.0018           |
| 2    | 2      | 1      | 1   | 1     | 0     | 4837.5387          | 0.0011            |
| 2    | 1      | 1      | 1   | 0     | 1     | 4865.7177          | 0.0030            |
| 2    | 2      | 1      | 1   | 1     | 1     | 5113.6199          | 0.0043            |
| 2    | 2      | 0      | 1   | 1     | 0     | 5022.9310          | -0.0014           |
| 3    | 0      | 3      | 2   | 1     | 2     | 5769.7853          | 0.0000            |
| 3    | 1      | 2      | 2   | 2     | 1     | 6131.3115          | -0.0017           |
| 3    | 1      | 3      | 2   | 0     | 2     | 5808.8801          | -0.0004           |
| 3    | 2      | 2      | 2   | 1     | 1     | 6656.2562          | -0.0041           |
| 3    | 2      | 1      | 2   | 1     | 2     | 8151.2424          | -0.0029           |
| 3    | 3      | 1      | 2   | 2     | 0     | 7503.6354          | -0.0043           |
| 3    | 3      | 0      | 2   | 2     | 1     | 7789.7107          | -0.0051           |
| 3    | 1      | 2      | 2   | 0     | 2     | 7364.6856          | 0.0198            |
| 3    | 2      | 2      | 2   | 1     | 2     | 7484.4879          | -0.0061           |
| 3    | 2      | 1      | 2   | 1     | 1     | 7323.0029          | -0.0087           |
| 3    | 3      | 1      | 2   | 2     | 1     | 7689.0191          | -0.0153           |
| 3    | 3      | 0      | 2   | 2     | 0     | 7604.3243          | 0.0032            |
| 4    | 1      | 3      | 4   | 0     | 4     | 2283.3060          | 0.0003            |
| 4    | 2      | 3      | 4   | 1     | 4     | 2321.4425          | -0.0015           |
| 4    | 4      | 0      | 4   | 1     | 3     | 3551.7381          | 0.0096            |
| 4    | 0      | 4      | 3   | 1     | 3     | 7604.3790          | -0.0044           |
| 4    | 1      | 3      | 3   | 2     | 2     | 8178.8076          | -0.0006           |
| 4    | 2      | 2      | 3   | 3     | 1     | 8202.8667          | 0.0040            |
| 4    | 2      | 3      | 3   | 3     | 0     | 6712.4761          | -0.0045           |
| 4    | 1      | 4      | 3   | 0     | 3     | 7611.0499          | -0.0024           |
| 4    | 2      | 3      | 3   | 1     | 2     | 8370.8828          | -0.0005           |
| 4    | 3      | 2      | 3   | 2     | 1     | 9338.9067          | 0.0007            |
| 4    | 3      | 1      | 3   | 2     | 2     | 10483.9705         | 0.0016            |
| 4    | 4      | 0      | 3   | 3     | 1     | 10325.9111         | 0.0001            |
| 4    | 1      | 3      | 3   | 0     | 3     | 9893.5271          | 0.0102            |
| 4    | 2      | 3      | 3   | 1     | 3     | 9926.6628          | -0.0058           |
| 4    | 3      | 2      | 3   | 2     | 2     | 10005.6600         | 0.0027            |
| 4    | 3      | 1      | 3   | 2     | 1     | 9817.2178          | 0.0002            |
| 4    | 4      | 1      | 3   | 3     | 0     | 10179.1829         | -0.0012           |
| 4    | 4      | 0      | 3   | 3     | 0     | 10225.2257         | -0.0039           |
| 5    | 1      | 4      | 5   | 0     | 5     | 2967.6198          | 0.0025            |
| 5    | 2      | 4      | 5   | 1     | 5     | 2974.8519          | -0.0059           |
| 5    | 2      | 3      | 5   | 1     | 4     | 2193.2313          | -0.0001           |
| 5    | 3      | 3      | 5   | 2     | 4     | 2327.9066          | -0.0012           |
| 5    | 5      | 1      | 5   | 4     | 2     | 2014.4249          | -0.0019           |
| 5    | 4      | 1      | 5   | 1     | 4     | 4560.8818          | -0.0154           |
| 5    | 5      | 0      | 5   | 2     | 3     | 4103.5712          | -0.0051           |
| 5    | 0      | 5      | 4   | 1     | 4     | 9425.7072          | -0.0007           |
| 5    | 1      | 4      | 4   | 2     | 3     | 10071.8847         | 0.0036            |
| 5    | 2      | 3      | 4   | 3     | 2     | 10477.2471         | 0.0042            |

*Continue on next page*

Table 1. *Continued from previous page*

| $J'$ | $K_a'$ | $K_c'$ | $J$ | $K_a$ | $K_c$ | $\nu_{obs.}$ [MHz] | $obs.-calc.$ |
|------|--------|--------|-----|-------|-------|--------------------|--------------|
| 5    | 3      | 2      | 4   | 4     | 1     | 10095.3058         | 0.0145       |
| 5    | 1      | 5      | 4   | 0     | 4     | 9426.6665          | 0.0080       |
| 5    | 2      | 4      | 4   | 1     | 3     | 10118.2135         | 0.0029       |
| 5    | 3      | 3      | 4   | 2     | 2     | 11017.4458         | 0.0076       |
| 6    | 1      | 5      | 6   | 0     | 6     | 3637.4787          | 0.0155       |
| 6    | 2      | 5      | 6   | 1     | 6     | 3638.6126          | -0.0148      |
| 6    | 2      | 4      | 6   | 1     | 5     | 2921.8774          | 0.0000       |
| 6    | 3      | 4      | 6   | 2     | 5     | 2955.5353          | -0.0008      |
| 6    | 3      | 3      | 6   | 2     | 4     | 2035.9904          | 0.0000       |
| 6    | 4      | 3      | 6   | 3     | 4     | 2364.6235          | -0.0016      |
| 6    | 5      | 2      | 6   | 4     | 3     | 2139.2086          | -0.0029      |
| 6    | 6      | 0      | 6   | 5     | 1     | 2245.4369          | -0.0012      |
| 6    | 6      | 1      | 6   | 5     | 2     | 2397.3089          | -0.0017      |
| 6    | 5      | 1      | 6   | 2     | 4     | 4697.6902          | 0.0009       |
| 6    | 0      | 6      | 5   | 1     | 5     | 11244.7234         | -0.0073      |
| 6    | 1      | 5      | 5   | 2     | 4     | 11907.3399         | 0.0038       |
| 6    | 3      | 4      | 5   | 4     | 1     | 10310.5104         | 0.0078       |
| 6    | 1      | 6      | 5   | 0     | 5     | 11244.8238         | -0.0298      |
| 6    | 2      | 5      | 5   | 1     | 4     | 11915.8703         | 0.0066       |
| 7    | 1      | 6      | 7   | 0     | 7     | 4303.8659          | 0.0070       |
| 7    | 2      | 6      | 7   | 1     | 7     | 4304.0229          | -0.0051      |
| 7    | 2      | 5      | 7   | 1     | 6     | 3608.2099          | 0.0037       |
| 7    | 3      | 5      | 7   | 2     | 6     | 3614.8391          | -0.0035      |
| 7    | 3      | 4      | 7   | 2     | 5     | 2830.1331          | 0.0005       |
| 7    | 4      | 4      | 7   | 3     | 5     | 2939.8436          | -0.0010      |
| 7    | 5      | 3      | 7   | 4     | 4     | 2451.2990          | 0.0001       |
| 7    | 6      | 2      | 7   | 5     | 3     | 2420.3170          | 0.0003       |
| 7    | 7      | 0      | 7   | 6     | 1     | 2739.2991          | 0.0027       |
| 7    | 7      | 1      | 7   | 6     | 2     | 2811.6798          | -0.0042      |
| 7    | 5      | 2      | 7   | 2     | 5     | 5998.3466          | 0.0155       |
| 7    | 6      | 1      | 7   | 3     | 4     | 5063.1045          | -0.0068      |
| 8    | 1      | 7      | 8   | 0     | 8     | 4969.4049          | 0.0121       |
| 8    | 2      | 7      | 8   | 1     | 8     | 4969.4049          | -0.0108      |
| 8    | 2      | 6      | 8   | 1     | 7     | 4280.2259          | -0.0016      |
| 8    | 3      | 6      | 8   | 2     | 7     | 4281.3682          | 0.0044       |
| 8    | 3      | 5      | 8   | 2     | 6     | 3557.1242          | -0.0004      |
| 8    | 4      | 5      | 8   | 3     | 6     | 3583.7972          | -0.0006      |
| 8    | 4      | 4      | 8   | 3     | 5     | 2669.1755          | -0.0006      |
| 8    | 5      | 4      | 8   | 4     | 5     | 2942.6438          | -0.0001      |
| 8    | 6      | 3      | 8   | 5     | 4     | 2603.5489          | 0.0015       |
| 8    | 7      | 1      | 8   | 6     | 2     | 2433.9642          | 0.0058       |
| 8    | 7      | 2      | 8   | 6     | 3     | 2762.6661          | -0.0011      |
| 8    | 8      | 0      | 8   | 7     | 1     | 3212.7738          | 0.0071       |
| 8    | 8      | 1      | 8   | 7     | 2     | 3244.1437          | -0.0127      |
| 8    | 6      | 2      | 8   | 3     | 5     | 5935.0230          | -0.0065      |
| 8    | 7      | 1      | 8   | 4     | 4     | 5699.8081          | -0.0037      |
| 9    | 1      | 8      | 9   | 0     | 9     | 5634.6232          | 0.0041       |
| 9    | 2      | 8      | 9   | 1     | 9     | 5634.6232          | 0.0011       |
| 9    | 2      | 7      | 9   | 1     | 8     | 4948.2952          | -0.0050      |
| 9    | 3      | 7      | 9   | 2     | 8     | 4948.4680          | -0.0091      |
| 9    | 3      | 6      | 9   | 2     | 7     | 4244.4065          | 0.0061       |

*Continue on next page*

Table 1. *Continued from previous page*

| $J'$ | $K_a'$ | $K_c'$ | $J$ | $K_a$ | $K_c$ | $\nu_{obs.}$ [MHz] | $obs.-calc.$ |
|------|--------|--------|-----|-------|-------|--------------------|--------------|
| 9    | 4      | 6      | 9   | 3     | 7     | 4249.7738          | -0.0005      |
| 9    | 4      | 5      | 9   | 3     | 6     | 3466.9931          | -0.0004      |
| 9    | 5      | 5      | 9   | 4     | 6     | 3550.5683          | 0.0000       |
| 9    | 5      | 4      | 9   | 4     | 5     | 2441.9692          | -0.0005      |
| 9    | 6      | 4      | 9   | 5     | 5     | 2983.4001          | -0.0006      |
| 9    | 7      | 2      | 9   | 6     | 3     | 2007.2468          | 0.0009       |
| 9    | 7      | 3      | 9   | 6     | 4     | 2828.7682          | 0.0000       |
| 9    | 8      | 1      | 9   | 7     | 2     | 2973.2086          | 0.0007       |
| 9    | 8      | 2      | 9   | 7     | 3     | 3151.5763          | -0.0035      |
| 9    | 9      | 0      | 9   | 8     | 1     | 3672.8553          | -0.0204      |
| 9    | 9      | 1      | 9   | 8     | 2     | 3685.6286          | -0.0036      |
| 9    | 7      | 2      | 9   | 4     | 5     | 6092.7263          | -0.0094      |
| 10   | 1      | 9      | 10  | 0     | 10    | 6299.6822          | -0.0029      |
| 10   | 2      | 9      | 10  | 1     | 10    | 6299.6822          | -0.0033      |
| 10   | 2      | 8      | 10  | 1     | 9     | 5615.0779          | 0.0137       |
| 10   | 3      | 8      | 10  | 2     | 9     | 5615.0779          | -0.0121      |
| 10   | 3      | 7      | 10  | 2     | 8     | 4918.6428          | 0.0020       |
| 10   | 4      | 7      | 10  | 3     | 8     | 4919.6074          | 0.0077       |
| 10   | 4      | 6      | 10  | 3     | 7     | 4189.1781          | 0.0015       |
| 10   | 5      | 6      | 10  | 4     | 7     | 4209.0901          | -0.0007      |
| 10   | 5      | 5      | 10  | 4     | 6     | 3313.6051          | -0.0009      |
| 10   | 6      | 5      | 10  | 5     | 6     | 3526.4561          | -0.0007      |
| 10   | 6      | 4      | 10  | 5     | 5     | 2202.9524          | 0.0002       |
| 10   | 7      | 4      | 10  | 6     | 5     | 3081.2813          | 0.0024       |
| 10   | 8      | 3      | 10  | 7     | 4     | 3124.6033          | -0.0003      |
| 10   | 8      | 2      | 10  | 7     | 3     | 2548.0832          | 0.0038       |
| 10   | 9      | 2      | 10  | 8     | 3     | 3571.2112          | -0.0029      |
| 10   | 9      | 1      | 10  | 8     | 2     | 3484.6854          | 0.0045       |
| 10   | 10     | 1      | 10  | 9     | 2     | 4130.9776          | 0.0142       |
| 10   | 10     | 0      | 10  | 9     | 1     | 4126.0089          | -0.0062      |
| 10   | 8      | 2      | 10  | 5     | 5     | 6531.2066          | -0.0113      |
| 11   | 1      | 10     | 11  | 0     | 11    | 6964.6460          | -0.0026      |
| 11   | 2      | 10     | 11  | 1     | 11    | 6964.6460          | -0.0026      |
| 11   | 2      | 9      | 11  | 1     | 10    | 6281.2159          | -0.0022      |
| 11   | 3      | 9      | 11  | 2     | 10    | 6281.2159          | -0.0057      |
| 11   | 3      | 8      | 11  | 2     | 9     | 5588.6936          | -0.0016      |
| 11   | 4      | 8      | 11  | 3     | 9     | 5588.8545          | 0.0024       |
| 11   | 4      | 7      | 11  | 3     | 8     | 4877.2121          | 0.0084       |
| 11   | 5      | 7      | 11  | 4     | 8     | 4881.2678          | -0.0041      |
| 11   | 5      | 6      | 11  | 4     | 7     | 4101.2828          | -0.0003      |
| 11   | 6      | 6      | 11  | 5     | 7     | 4162.2322          | -0.0006      |
| 11   | 6      | 5      | 11  | 5     | 6     | 3081.5840          | -0.0011      |
| 11   | 7      | 5      | 11  | 6     | 6     | 3528.7378          | 0.0003       |
| 11   | 7      | 4      | 11  | 6     | 5     | 2042.2479          | -0.0006      |
| 11   | 8      | 4      | 11  | 7     | 5     | 3249.9039          | -0.0018      |
| 11   | 8      | 3      | 11  | 7     | 4     | 2112.0361          | -0.0010      |
| 11   | 9      | 3      | 11  | 8     | 4     | 3480.2557          | -0.0024      |
| 11   | 9      | 2      | 11  | 8     | 3     | 3128.8345          | -0.0002      |
| 11   | 10     | 2      | 11  | 9     | 3     | 4008.3705          | -0.0065      |
| 11   | 10     | 1      | 11  | 9     | 2     | 3969.6391          | 0.0005       |
| 11   | 11     | 1      | 11  | 10    | 2     | 4577.6681          | 0.0189       |

*Continue on next page*

Table 1. *Continued from previous page*

| $J'$ | $K_a'$ | $K_c'$ | $J$ | $K_a$ | $K_c$ | $\nu_{obs.}$ [MHz] | $obs.-calc.$ |
|------|--------|--------|-----|-------|-------|--------------------|--------------|
| 11   | 11     | 0      | 11  | 10    | 1     | 4575.7910          | 0.0290       |
| 11   | 8      | 3      | 11  | 5     | 6     | 7235.8696          | -0.0011      |
| 12   | 1      | 11     | 12  | 0     | 12    | 7629.5358          | -0.0045      |
| 12   | 2      | 11     | 12  | 1     | 12    | 7629.5358          | -0.0045      |
| 12   | 2      | 10     | 12  | 1     | 11    | 6947.0033          | -0.0031      |
| 12   | 3      | 10     | 12  | 2     | 11    | 6947.0033          | -0.0036      |
| 12   | 3      | 9      | 12  | 2     | 10    | 6257.0344          | 0.0076       |
| 12   | 4      | 9      | 12  | 3     | 10    | 6257.0344          | -0.0165      |
| 12   | 4      | 8      | 12  | 3     | 9     | 5553.6852          | 0.0051       |
| 12   | 5      | 8      | 12  | 4     | 9     | 5554.4410          | 0.0135       |
| 12   | 5      | 7      | 12  | 4     | 8     | 4818.4538          | 0.0009       |
| 12   | 6      | 7      | 12  | 5     | 8     | 4832.7666          | 0.0008       |
| 12   | 6      | 6      | 12  | 5     | 7     | 3959.3216          | 0.0003       |
| 12   | 7      | 6      | 12  | 6     | 7     | 4117.2212          | -0.0005      |
| 12   | 7      | 5      | 12  | 6     | 6     | 2795.6215          | -0.0025      |
| 12   | 8      | 5      | 12  | 7     | 6     | 3577.5114          | 0.0010       |
| 12   | 8      | 4      | 12  | 7     | 5     | 2042.0336          | -0.0028      |
| 12   | 9      | 4      | 12  | 8     | 5     | 3493.8920          | -0.0005      |
| 12   | 9      | 3      | 12  | 8     | 4     | 2612.9942          | 0.0010       |
| 12   | 10     | 2      | 12  | 9     | 3     | 3690.9921          | 0.0011       |
| 12   | 9      | 3      | 12  | 6     | 6     | 7450.6477          | -0.0059      |
| 13   | 1      | 12     | 13  | 0     | 13    | 8294.3693          | -0.0095      |
| 13   | 2      | 11     | 13  | 1     | 12    | 7612.5443          | -0.0032      |
| 13   | 3      | 11     | 13  | 2     | 12    | 7612.5443          | -0.0032      |
| 13   | 3      | 10     | 13  | 2     | 11    | 6924.4169          | -0.0011      |
| 13   | 4      | 10     | 13  | 3     | 11    | 6924.4169          | -0.0046      |
| 13   | 4      | 9      | 13  | 3     | 10    | 6225.8491          | 0.0044       |
| 13   | 5      | 9      | 13  | 4     | 10    | 6225.9741          | 0.0025       |
| 13   | 5      | 8      | 13  | 4     | 9     | 5507.3799          | 0.0089       |
| 13   | 6      | 8      | 13  | 5     | 9     | 5510.3192          | -0.0041      |
| 13   | 6      | 7      | 13  | 5     | 8     | 4732.3097          | -0.0016      |
| 13   | 7      | 7      | 13  | 6     | 8     | 4775.4381          | 0.0014       |
| 13   | 7      | 6      | 13  | 6     | 7     | 3739.7230          | -0.0025      |
| 13   | 8      | 6      | 13  | 7     | 7     | 4088.2151          | 0.0017       |
| 13   | 8      | 5      | 13  | 7     | 6     | 2533.1039          | 0.0001       |
| 13   | 9      | 5      | 13  | 8     | 6     | 3690.6982          | 0.0000       |
| 13   | 9      | 4      | 13  | 8     | 5     | 2248.6203          | -0.0049      |
| 13   | 10     | 4      | 13  | 9     | 5     | 3808.1137          | -0.0031      |
| 13   | 10     | 3      | 13  | 9     | 4     | 3211.2385          | 0.0019       |
| 13   | 11     | 3      | 13  | 10    | 4     | 4308.6561          | -0.0048      |
| 13   | 11     | 2      | 13  | 10    | 3     | 4216.0782          | 0.0023       |
| 13   | 12     | 1      | 13  | 11    | 2     | 4896.6515          | 0.0080       |
| 14   | 2      | 12     | 14  | 1     | 13    | 8277.9119          | 0.0012       |
| 14   | 3      | 11     | 14  | 2     | 12    | 7591.1979          | -0.0030      |
| 14   | 4      | 11     | 14  | 3     | 12    | 7591.1979          | -0.0035      |
| 14   | 4      | 10     | 14  | 3     | 11    | 6895.9263          | 0.0065       |
| 14   | 5      | 10     | 14  | 4     | 11    | 6895.9263          | -0.0137      |
| 14   | 5      | 9      | 14  | 4     | 10    | 6186.0631          | -0.0035      |
| 14   | 6      | 9      | 14  | 5     | 10    | 6186.6242          | 0.0034       |
| 14   | 6      | 8      | 14  | 5     | 9     | 5445.4562          | 0.0065       |
| 14   | 7      | 8      | 14  | 6     | 9     | 5455.4674          | -0.0011      |

*Continue on next page*

Table 1. *Continued from previous page*

| $J'$ | $K_a'$ | $K_c'$ | $J$ | $K_a$ | $K_c$ | $\nu_{obs.}$ [MHz] | $obs.-calc.$ |
|------|--------|--------|-----|-------|-------|--------------------|--------------|
| 14   | 7      | 7      | 14  | 6     | 8     | 4601.4150          | 0.0003       |
| 14   | 8      | 7      | 14  | 7     | 8     | 4714.5522          | 0.0017       |
| 14   | 8      | 6      | 14  | 7     | 7     | 3440.4202          | 0.0006       |
| 14   | 9      | 6      | 14  | 8     | 7     | 4094.2143          | 0.0020       |
| 14   | 9      | 5      | 14  | 8     | 6     | 2392.9967          | 0.0023       |
| 14   | 10     | 5      | 14  | 9     | 6     | 3879.3259          | 0.0060       |
| 14   | 10     | 4      | 14  | 9     | 5     | 2664.1508          | -0.0010      |
| 14   | 11     | 4      | 14  | 10    | 5     | 4179.8431          | -0.0008      |
| 14   | 11     | 3      | 14  | 10    | 4     | 3824.4856          | 0.0040       |
| 14   | 12     | 3      | 14  | 11    | 4     | 4752.9459          | -0.0040      |
| 14   | 12     | 2      | 14  | 11    | 3     | 4710.6761          | -0.0093      |
| 14   | 14     | 1      | 14  | 13    | 2     | 5918.2292          | 0.0146       |
| 14   | 14     | 0      | 14  | 13    | 1     | 5918.1134          | -0.0172      |
| 15   | 2      | 13     | 15  | 1     | 14    | 8943.1491          | 0.0082       |
| 15   | 4      | 12     | 15  | 3     | 13    | 8257.5517          | -0.0049      |
| 15   | 4      | 11     | 15  | 3     | 12    | 7564.7308          | -0.0023      |
| 15   | 5      | 11     | 15  | 4     | 12    | 7564.7308          | -0.0053      |
| 15   | 5      | 10     | 15  | 4     | 11    | 6860.3692          | 0.0027       |
| 15   | 6      | 9      | 15  | 5     | 10    | 6135.4694          | -0.0028      |
| 15   | 7      | 9      | 15  | 6     | 10    | 6137.5505          | -0.0030      |
| 15   | 7      | 8      | 15  | 6     | 9     | 5360.2858          | 0.0013       |
| 15   | 8      | 8      | 15  | 7     | 9     | 5390.1249          | -0.0083      |
| 15   | 8      | 7      | 15  | 7     | 8     | 4401.4506          | 0.0008       |
| 15   | 9      | 7      | 15  | 8     | 8     | 4660.9218          | 0.0013       |
| 15   | 9      | 6      | 15  | 8     | 7     | 3110.2385          | -0.0039      |
| 15   | 10     | 6      | 15  | 9     | 7     | 4155.2592          | -0.0003      |
| 15   | 10     | 5      | 15  | 9     | 6     | 2451.5701          | 0.0029       |
| 15   | 11     | 5      | 15  | 10    | 6     | 4144.8257          | 0.0009       |
| 15   | 11     | 4      | 15  | 10    | 5     | 3238.8341          | 0.0051       |
| 15   | 12     | 4      | 15  | 11    | 5     | 4592.8087          | 0.0009       |
| 15   | 12     | 3      | 15  | 11    | 4     | 4403.1027          | 0.0052       |
| 15   | 14     | 2      | 15  | 13    | 3     | 5803.3137          | -0.0202      |
| 15   | 14     | 1      | 15  | 13    | 2     | 5802.3180          | -0.0001      |
| 16   | 3      | 13     | 16  | 2     | 14    | 8923.6117          | 0.0138       |
| 16   | 4      | 12     | 16  | 3     | 13    | 8232.7007          | 0.0125       |
| 16   | 5      | 11     | 16  | 4     | 12    | 7532.2607          | 0.0017       |
| 16   | 6      | 11     | 16  | 5     | 12    | 7532.2607          | -0.0143      |
| 16   | 6      | 10     | 16  | 5     | 11    | 6816.3317          | -0.0056      |
| 16   | 7      | 10     | 16  | 6     | 11    | 6816.7479          | 0.0133       |
| 16   | 7      | 9      | 16  | 6     | 10    | 6070.6332          | 0.0005       |
| 16   | 8      | 9      | 16  | 7     | 10    | 6077.5025          | -0.0081      |
| 16   | 8      | 8      | 16  | 7     | 9     | 5238.3986          | -0.0011      |
| 16   | 9      | 8      | 16  | 8     | 9     | 5317.4278          | 0.0054       |
| 16   | 9      | 7      | 16  | 8     | 8     | 4113.7309          | -0.0074      |
| 16   | 10     | 7      | 16  | 9     | 8     | 4631.0994          | -0.0031      |
| 16   | 10     | 6      | 16  | 9     | 7     | 2845.5118          | 0.0011       |
| 16   | 11     | 6      | 16  | 10    | 7     | 4287.4522          | -0.0007      |
| 16   | 11     | 5      | 16  | 10    | 6     | 2741.2686          | -0.0065      |
| 16   | 12     | 5      | 16  | 11    | 6     | 4479.2815          | 0.0019       |
| 16   | 12     | 4      | 16  | 11    | 5     | 3884.8863          | 0.0032       |
| 16   | 13     | 4      | 16  | 12    | 5     | 5031.4818          | -0.0017      |

*Continue on next page*

Table 1. *Continued from previous page*

| $J'$ | $K_a'$ | $K_c'$ | $J$ | $K_a$ | $K_c$ | $\nu_{obs.}$ [MHz] | $obs.-calc.$ |
|------|--------|--------|-----|-------|-------|--------------------|--------------|
| 16   | 13     | 3      | 16  | 12    | 4     | 4938.2471          | 0.0068       |
| 16   | 14     | 3      | 16  | 13    | 4     | 5658.7898          | -0.0133      |
| 16   | 14     | 2      | 16  | 13    | 3     | 5651.1747          | 0.0095       |
| 17   | 5      | 12     | 17  | 4     | 13    | 8202.6045          | 0.0105       |
| 17   | 6      | 11     | 17  | 5     | 12    | 7492.7584          | 0.0213       |
| 17   | 7      | 10     | 17  | 6     | 11    | 6761.9391          | -0.0003      |
| 17   | 8      | 10     | 17  | 7     | 11    | 6763.3812          | 0.0052       |
| 17   | 8      | 9      | 17  | 7     | 10    | 5985.7289          | 0.0009       |
| 17   | 9      | 9      | 17  | 8     | 10    | 6006.0371          | -0.0080      |
| 17   | 9      | 8      | 17  | 8     | 9     | 5058.4643          | -0.0012      |
| 17   | 10     | 8      | 17  | 9     | 9     | 5245.0382          | 0.0009       |
| 17   | 10     | 7      | 17  | 9     | 8     | 3754.7292          | 0.0017       |
| 17   | 11     | 7      | 17  | 10    | 8     | 4645.1837          | -0.0059      |
| 17   | 11     | 6      | 17  | 10    | 7     | 2747.4785          | 0.0080       |
| 17   | 12     | 6      | 17  | 11    | 7     | 4498.8173          | -0.0014      |
| 17   | 12     | 5      | 17  | 11    | 6     | 3243.0338          | 0.0002       |
| 17   | 13     | 5      | 17  | 12    | 6     | 4868.2094          | 0.0061       |
| 17   | 13     | 4      | 17  | 12    | 5     | 4521.7259          | 0.0024       |
| 17   | 14     | 4      | 17  | 13    | 5     | 5483.8426          | -0.0038      |
| 17   | 14     | 3      | 17  | 13    | 4     | 5440.7248          | 0.0030       |
| 18   | 7      | 11     | 18  | 6     | 12    | 7444.9392          | 0.0419       |
| 18   | 8      | 10     | 18  | 7     | 11    | 6694.3947          | 0.0000       |
| 18   | 9      | 10     | 18  | 8     | 11    | 6699.0398          | -0.0067      |
| 18   | 9      | 9      | 18  | 8     | 10    | 5870.5027          | -0.0086      |
| 18   | 10     | 9      | 18  | 9     | 10    | 5924.6599          | -0.0026      |
| 18   | 10     | 8      | 18  | 9     | 9     | 4795.4955          | -0.0008      |
| 18   | 11     | 8      | 18  | 10    | 9     | 5186.4088          | 0.0034       |
| 18   | 11     | 7      | 18  | 10    | 8     | 3397.7301          | -0.0021      |
| 18   | 12     | 7      | 18  | 11    | 8     | 4722.5099          | -0.0035      |
| 18   | 12     | 6      | 18  | 11    | 7     | 2881.7945          | -0.0053      |
| 18   | 13     | 6      | 18  | 12    | 7     | 4787.5366          | -0.0010      |
| 18   | 13     | 5      | 18  | 12    | 6     | 3884.2908          | 0.0007       |
| 18   | 14     | 4      | 18  | 13    | 5     | 5111.3870          | -0.0010      |
| 18   | 14     | 5      | 18  | 13    | 6     | 5294.8462          | -0.0037      |
| 18   | 15     | 3      | 18  | 14    | 4     | 5923.0189          | -0.0084      |
| 19   | 8      | 11     | 19  | 7     | 12    | 7387.0920          | -0.0087      |
| 19   | 9      | 11     | 19  | 8     | 12    | 7388.0798          | 0.0033       |
| 19   | 9      | 10     | 19  | 8     | 11    | 6609.2003          | -0.0036      |
| 19   | 10     | 10     | 19  | 9     | 11    | 6622.8453          | -0.0083      |
| 19   | 10     | 9      | 19  | 9     | 10    | 5707.7610          | 0.0139       |
| 19   | 11     | 9      | 19  | 10    | 10    | 5838.4372          | 0.0119       |
| 19   | 11     | 8      | 19  | 10    | 9     | 4440.7785          | -0.0098      |
| 19   | 12     | 8      | 19  | 11    | 9     | 5160.0047          | -0.0116      |
| 19   | 12     | 7      | 19  | 11    | 8     | 3152.4487          | -0.0032      |
| 19   | 13     | 7      | 19  | 12    | 8     | 4876.8462          | 0.0032       |
| 19   | 13     | 6      | 19  | 12    | 7     | 3263.2673          | -0.0135      |
| 19   | 14     | 6      | 19  | 13    | 7     | 5143.0380          | 0.0055       |
| 19   | 14     | 5      | 19  | 13    | 6     | 4567.7080          | 0.0072       |
| 19   | 15     | 4      | 19  | 14    | 5     | 5653.7541          | 0.0049       |
| 19   | 15     | 5      | 19  | 14    | 6     | 5744.1272          | -0.0031      |
| 19   | 16     | 3      | 19  | 15    | 4     | 6393.7395          | 0.0310       |

*Continue on next page*



Table 1. *Continued from previous page*

| $J'$ | $K_a'$ | $K_c'$ | $J$ | $K_a$ | $K_c$ | $\nu_{obs.}$ [MHz] | $obs.-calc.$ |
|------|--------|--------|-----|-------|-------|--------------------|--------------|
| 19   | 16     | 4      | 19  | 15    | 5     | 6401.8088          | -0.0096      |
| 20   | 9      | 11     | 20  | 8     | 12    | 7317.0551          | 0.0057       |
| 20   | 10     | 11     | 20  | 9     | 12    | 7320.1562          | -0.0024      |
| 20   | 10     | 10     | 20  | 9     | 11    | 6498.6072          | -0.0056      |
| 20   | 11     | 9      | 20  | 10    | 10    | 5472.8709          | -0.0008      |
| 20   | 11     | 10     | 20  | 10    | 11    | 6535.1689          | -0.0098      |
| 20   | 12     | 9      | 20  | 11    | 10    | 5757.5113          | -0.0014      |
| 20   | 13     | 7      | 20  | 12    | 8     | 3116.1657          | 0.0183       |
| 20   | 14     | 7      | 20  | 13    | 8     | 5112.9626          | 0.0012       |
| 20   | 15     | 5      | 20  | 14    | 6     | 5220.2502          | -0.0036      |
| 20   | 15     | 6      | 20  | 14    | 7     | 5549.3899          | -0.0025      |
| 20   | 16     | 4      | 20  | 15    | 5     | 6162.6166          | 0.0019       |
| 20   | 16     | 5      | 20  | 15    | 6     | 6204.7918          | -0.0141      |
| 20   | 17     | 3      | 20  | 16    | 4     | 6857.6739          | -0.0047      |
| 21   | 10     | 11     | 21  | 9     | 12    | 7231.1961          | -0.0047      |
| 21   | 11     | 11     | 21  | 10    | 12    | 7240.2675          | -0.0077      |
| 21   | 11     | 10     | 21  | 10    | 11    | 6349.2620          | -0.0091      |
| 21   | 12     | 10     | 21  | 11    | 11    | 6439.0002          | -0.0016      |
| 21   | 12     | 9      | 21  | 11    | 10    | 5143.5628          | -0.0020      |
| 21   | 13     | 9      | 21  | 12    | 10    | 5697.7575          | 0.0263       |
| 21   | 14     | 8      | 21  | 13    | 9     | 5283.6229          | 0.0077       |
| 21   | 15     | 7      | 21  | 14    | 8     | 5425.8240          | -0.0009      |
| 21   | 16     | 6      | 21  | 15    | 7     | 5989.6868          | -0.0004      |
| 21   | 16     | 5      | 21  | 15    | 6     | 5816.7045          | 0.0024       |
| 22   | 11     | 11     | 22  | 10    | 12    | 7123.6467          | -0.0062      |
| 22   | 12     | 11     | 22  | 11    | 12    | 7148.0653          | 0.0066       |
| 22   | 12     | 10     | 22  | 11    | 11    | 6140.0967          | -0.0087      |
| 22   | 13     | 10     | 22  | 12    | 11    | 6341.5214          | 0.0032       |
| 22   | 13     | 9      | 22  | 12    | 10    | 4726.5114          | 0.0020       |
| 22   | 14     | 9      | 22  | 13    | 10    | 5678.9961          | -0.0009      |
| 22   | 15     | 8      | 22  | 14    | 9     | 5462.6385          | 0.0072       |
| 22   | 16     | 6      | 22  | 15    | 7     | 5257.7089          | 0.0048       |
| 22   | 16     | 7      | 22  | 15    | 8     | 5802.5002          | 0.0055       |
| 22   | 17     | 5      | 22  | 16    | 6     | 6364.1308          | 0.0025       |
| 22   | 17     | 6      | 22  | 16    | 7     | 6449.4372          | -0.0124      |
| 23   | 11     | 12     | 23  | 10    | 13    | 7852.0985          | -0.0064      |
| 23   | 12     | 11     | 23  | 11    | 12    | 6984.2590          | -0.0004      |
| 23   | 13     | 11     | 23  | 12    | 12    | 7044.9374          | -0.0026      |
| 23   | 13     | 10     | 23  | 12    | 11    | 5844.8459          | -0.0148      |
| 23   | 14     | 10     | 23  | 13    | 11    | 6255.3603          | -0.0009      |
| 23   | 15     | 9      | 23  | 14    | 10    | 5721.6734          | -0.0015      |
| 23   | 16     | 8      | 23  | 15    | 9     | 5724.8692          | 0.0023       |
| 23   | 17     | 6      | 23  | 16    | 7     | 5919.4089          | 0.0009       |
| 23   | 18     | 6      | 23  | 17    | 7     | 6918.2910          | -0.0186      |
| 23   | 18     | 5      | 23  | 17    | 6     | 6878.2183          | 0.0142       |
| 24   | 12     | 12     | 24  | 11    | 13    | 7746.4515          | -0.0009      |
| 24   | 13     | 11     | 24  | 12    | 12    | 6796.1578          | -0.0120      |
| 24   | 13     | 12     | 24  | 12    | 13    | 7762.5892          | -0.0001      |
| 24   | 14     | 11     | 24  | 13    | 12    | 6935.6076          | 0.0044       |
| 24   | 14     | 10     | 24  | 13    | 11    | 5448.2479          | -0.0030      |
| 24   | 15     | 10     | 24  | 14    | 11    | 6198.4036          | -0.0036      |

*Continue on next page*

Table 1. *Continued from previous page*

| $J'$ | $K_a'$ | $K_c'$ | $J$ | $K_a$ | $K_c$ | $\nu_{obs.}$ [MHz] | $obs.-calc.$ |
|------|--------|--------|-----|-------|-------|--------------------|--------------|
| 24   | 16     | 9      | 24  | 15    | 10    | 5841.8914          | 0.0018       |
| 24   | 17     | 8      | 24  | 16    | 9     | 6062.2070          | -0.0037      |
| 24   | 17     | 7      | 24  | 16    | 8     | 5224.8004          | 0.0064       |
| 24   | 18     | 7      | 24  | 17    | 8     | 6679.5162          | 0.0043       |
| 24   | 18     | 6      | 24  | 17    | 7     | 6519.4333          | -0.0062      |
| 24   | 19     | 5      | 24  | 18    | 6     | 7371.7699          | 0.0073       |
| 25   | 13     | 12     | 25  | 12    | 13    | 7614.2073          | 0.0057       |
| 25   | 14     | 12     | 25  | 13    | 13    | 7654.7424          | -0.0048      |
| 25   | 14     | 11     | 25  | 13    | 12    | 6534.8350          | -0.0039      |
| 25   | 15     | 11     | 25  | 14    | 12    | 6829.4911          | -0.0114      |
| 25   | 15     | 10     | 25  | 14    | 11    | 4977.3977          | 0.0293       |
| 25   | 16     | 10     | 25  | 15    | 11    | 6191.4403          | -0.0078      |
| 25   | 17     | 9      | 25  | 16    | 10    | 6047.5876          | 0.0128       |
| 25   | 18     | 8      | 25  | 17    | 9     | 6459.7146          | -0.0006      |
| 26   | 14     | 12     | 26  | 13    | 13    | 7442.3517          | -0.0049      |
| 26   | 17     | 10     | 26  | 16    | 11    | 6254.0349          | -0.0075      |
| 26   | 18     | 9      | 26  | 17    | 10    | 6336.7204          | -0.0040      |
| 26   | 19     | 7      | 26  | 18    | 8     | 6618.4943          | 0.0024       |
| 26   | 19     | 8      | 26  | 18    | 9     | 6899.7284          | 0.0039       |
| 26   | 20     | 7      | 26  | 19    | 8     | 7626.0656          | -0.0098      |
| 27   | 15     | 12     | 27  | 14    | 13    | 7210.3636          | 0.0092       |
| 27   | 16     | 12     | 27  | 15    | 13    | 7416.7458          | -0.0063      |
| 27   | 16     | 11     | 27  | 15    | 12    | 5713.0594          | 0.0157       |
| 27   | 18     | 10     | 27  | 17    | 11    | 6399.9264          | -0.0021      |
| 27   | 19     | 9      | 27  | 18    | 10    | 6698.4191          | 0.0119       |
| 27   | 19     | 8      | 27  | 18    | 9     | 5913.6512          | -0.0056      |
| 27   | 20     | 7      | 27  | 19    | 8     | 7219.8206          | 0.0066       |
| 28   | 17     | 12     | 28  | 16    | 13    | 7304.9668          | -0.0014      |
| 28   | 18     | 11     | 28  | 17    | 12    | 6700.2695          | -0.0087      |
| 29   | 18     | 12     | 29  | 17    | 13    | 7219.0538          | -0.0063      |
| 29   | 19     | 11     | 29  | 18    | 12    | 6786.0546          | 0.0036       |

Table 2: Experimental transition frequencies and rotational constants for  $^{13}\text{C}1$  isotopologue of *anti*, *cis*-verbenol, and substitution coordinates of the substituted carbon atom.

| $J''$         | $K_a''$ | $K_c''$       | $J'$ | $K_a'$       | $K_c'$ | $\nu_{obs.}$ [MHz] | obs.-calc.     |
|---------------|---------|---------------|------|--------------|--------|--------------------|----------------|
| 2             | 0       | 2             | 1    | 1            | 1      | 3870.3378          | 0.0079         |
| 2             | 1       | 2             | 1    | 0            | 1      | 4028.9270          | -0.0053        |
| 2             | 2       | 1             | 1    | 1            | 0      | 4826.1640          | 0.0177         |
| 2             | 2       | 0             | 1    | 1            | 1      | 5282.9800          | -0.0055        |
| 3             | 0       | 3             | 2    | 1            | 2      | 5756.7900          | -0.0012        |
| 3             | 1       | 3             | 2    | 0            | 2      | 5796.6457          | -0.0076        |
| 3             | 2       | 2             | 2    | 1            | 1      | 6641.3061          | -0.0028        |
| 3             | 3       | 1             | 2    | 2            | 0      | 7485.9612          | -0.0033        |
| 4             | 0       | 4             | 3    | 1            | 3      | 7588.1230          | 0.0059         |
| 4             | 1       | 4             | 3    | 0            | 3      | 7594.9960          | -0.0022        |
| $A_0$ [MHz]   |         | $B_0$ [MHz]   |      | $C_0$ [MHz]  |        | $N_{lines}$        | $r.m.s.$ [MHz] |
| 1306.1883(28) |         | 1181.4440(69) |      | 907.5813(17) |        | 10                 | 0.0074         |
| $ a_s $ [Å]   |         | $ b_s $ [Å]   |      | $ c_s $ [Å]  |        |                    |                |
| 0.8873(19)    |         | 0.5505(30)    |      | 0.8097(21)   |        |                    |                |

Table 3: Experimental transition frequencies and rotational constants for  $^{13}\text{C}_2$  isotopologue of *anti*, *cis*-verbenol, and substitution coordinates of the substituted carbon atom.

| $J''$         | $K_a''$ | $K_c''$       | $J'$ | $K_a'$       | $K_c'$ | $\nu_{obs.}$ [MHz] | obs.-calc.     |
|---------------|---------|---------------|------|--------------|--------|--------------------|----------------|
| 2             | 0       | 2             | 1    | 1            | 1      | 3871.4367          | -0.0068        |
| 2             | 1       | 2             | 1    | 0            | 1      | 4016.9845          | 0.0048         |
| 2             | 2       | 1             | 1    | 1            | 0      | 4807.3430          | -0.0044        |
| 2             | 2       | 0             | 1    | 1            | 1      | 5278.6245          | 0.0037         |
| 3             | 0       | 3             | 2    | 1            | 2      | 5748.4498          | 0.0025         |
| 3             | 1       | 3             | 2    | 0            | 2      | 5782.6518          | -0.0006        |
| 3             | 2       | 2             | 2    | 1            | 1      | 6618.2500          | 0.0046         |
| 3             | 3       | 1             | 2    | 2            | 0      | 7453.8350          | -0.0034        |
| 4             | 0       | 4             | 3    | 1            | 3      | 7573.3465          | -0.0072        |
| 4             | 1       | 4             | 3    | 0            | 3      | 7578.8400          | 0.0062         |
| $A_0$ [MHz]   |         | $B_0$ [MHz]   |      | $C_0$ [MHz]  |        | $N_{lines}$        | $r.m.s.$ [MHz] |
| 1300.6328(29) |         | 1184.4752(68) |      | 905.4490(17) |        | 10                 | 0.0048         |
| $ a_s $ [Å]   |         | $ b_s $ [Å]   |      | $ c_s $ [Å]  |        |                    |                |
| 0.2671(62)    |         | 1.5278(11)    |      | 0.5274(32)   |        |                    |                |

Table 4: Experimental transition frequencies and rotational constants for  $^{13}\text{C}3$  isotopologue of *anti*, *cis*-verbenol, and substitution coordinates of the substituted carbon atom.

| $J''$         | $K_a''$ | $K_c''$       | $J'$ | $K_a'$       | $K_c'$ | $\nu_{obs.}$ [MHz] | obs.-calc.     |
|---------------|---------|---------------|------|--------------|--------|--------------------|----------------|
| 2             | 0       | 2             | 1    | 1            | 1      | 3858.2802          | -0.0080        |
| 2             | 1       | 2             | 1    | 0            | 1      | 4022.1190          | -0.0263        |
| 2             | 2       | 1             | 1    | 1            | 0      | 4827.5830          | 0.0331         |
| 2             | 2       | 0             | 1    | 1            | 1      | 5283.5530          | 0.0004         |
| 3             | 0       | 3             | 2    | 1            | 2      | 5741.4345          | 0.0019         |
| 3             | 1       | 3             | 2    | 0            | 2      | 5783.4208          | 0.0019         |
| 3             | 2       | 2             | 2    | 1            | 1      | 6637.2659          | -0.0055        |
| 3             | 3       | 1             | 2    | 2            | 0      | 7491.1111          | -0.0129        |
| 4             | 0       | 4             | 3    | 1            | 3      | 7568.1317          | 0.0043         |
| 4             | 1       | 4             | 3    | 0            | 3      | 7575.5406          | 0.0070         |
| $A_0$ [MHz]   |         | $B_0$ [MHz]   |      | $C_0$ [MHz]  |        | $N_{lines}$        | $r.m.s.$ [MHz] |
| 1307.5631(28) |         | 1179.2483(69) |      | 904.8608(17) |        | 10                 | 0.0102         |
| $ a_s $ [Å]   |         | $ b_s $ [Å]   |      | $ c_s $ [Å]  |        |                    |                |
| 1.4865(11)    |         | 0.7513(22)    |      | 0.083(20)    |        |                    |                |

Table 5: Experimental transition frequencies and rotational constants for  $^{13}\text{C}_4$  isotopologue of *anti*, *cis*-verbenol, and substitution coordinates of the substituted carbon atom.

| $J''$         | $K_a''$ | $K_c''$       | $J'$ | $K_a'$       | $K_c'$ | $\nu_{obs.}$ [MHz] | obs.-calc.     |
|---------------|---------|---------------|------|--------------|--------|--------------------|----------------|
| 2             | 0       | 2             | 1    | 1            | 1      | 3860.6752          | 0.0129         |
| 2             | 1       | 2             | 1    | 0            | 1      | 4024.8957          | 0.0091         |
| 2             | 2       | 1             | 1    | 1            | 0      | 4830.4951          | -0.0117        |
| 2             | 2       | 0             | 1    | 1            | 1      | 5286.1350          | -0.0067        |
| 3             | 0       | 3             | 2    | 1            | 2      | 5745.2686          | 0.0019         |
| 3             | 1       | 3             | 2    | 0            | 2      | 5787.4115          | -0.0072        |
| 3             | 2       | 2             | 2    | 1            | 1      | 6641.5530          | 0.0080         |
| 3             | 3       | 1             | 2    | 2            | 0      | 7495.6781          | 0.0067         |
| 4             | 0       | 4             | 3    | 1            | 3      | 7573.3465          | 0.0058         |
| 4             | 1       | 4             | 3    | 0            | 3      | 7580.7726          | -0.0177        |
| $A_0$ [MHz]   |         | $B_0$ [MHz]   |      | $C_0$ [MHz]  |        | $N_{lines}$        | $r.m.s.$ [MHz] |
| 1308.3292(28) |         | 1179.7768(69) |      | 905.5192(17) |        | 10                 | 0.0097         |
| $ a_s $ [Å]   |         | $ b_s $ [Å]   |      | $ c_s $ [Å]  |        |                    |                |
| 1.4273(12)    |         | 0.5744(29)    |      | 0.024(68)    |        |                    |                |

Table 6: Experimental transition frequencies and rotational constants for  $^{13}\text{C}5$  isotopologue of *anti*, *cis*-verbenol, and substitution coordinates of the substituted carbon atom.

| $J''$         | $K_a''$ | $K_c''$       | $J'$ | $K_a'$       | $K_c'$ | $\nu_{obs.}$ [MHz] | obs.-calc.     |
|---------------|---------|---------------|------|--------------|--------|--------------------|----------------|
| 2             | 0       | 2             | 1    | 1            | 1      | 3875.0248          | 0.0130         |
| 2             | 1       | 2             | 1    | 0            | 1      | 4024.2560          | 0.0076         |
| 2             | 2       | 1             | 1    | 1            | 0      | 4817.9610          | 0.0176         |
| 2             | 2       | 0             | 1    | 1            | 1      | 5286.2727          | -0.0082        |
| 3             | 0       | 3             | 2    | 1            | 2      | 5756.3294          | 0.0117         |
| 3             | 1       | 3             | 2    | 0            | 2      | 5792.0400          | 0.0043         |
| 3             | 2       | 2             | 2    | 1            | 1      | 6631.6366          | -0.0073        |
| 3             | 3       | 1             | 2    | 2            | 0      | 7471.2505          | -0.0016        |
| 4             | 0       | 4             | 3    | 1            | 3      | 7584.5954          | -0.0124        |
| 4             | 1       | 4             | 3    | 0            | 3      | 7590.4389          | -0.0079        |
| $A_0$ [MHz]   |         | $B_0$ [MHz]   |      | $C_0$ [MHz]  |        | $N_{lines}$        | $r.m.s.$ [MHz] |
| 1303.6977(28) |         | 1185.0492(68) |      | 906.8502(17) |        | 10                 | 0.0102         |
| $ a_s $ [Å]   |         | $ b_s $ [Å]   |      | $ c_s $ [Å]  |        |                    |                |
| i0.047(36)    |         | 1.2433(13)    |      | 0.3815(44)   |        |                    |                |

Table 7: Experimental transition frequencies and rotational constants for  $^{13}\text{C}_6$  isotopologue of *anti*, *cis*-verbenol, and substitution coordinates of the substituted carbon atom.

| $J''$         | $K_a''$ | $K_c''$       | $J'$ | $K_a'$       | $K_c'$ | $\nu_{obs.}$ [MHz] | obs.-calc.     |
|---------------|---------|---------------|------|--------------|--------|--------------------|----------------|
| 2             | 0       | 2             | 1    | 1            | 1      | 3870.3378          | 0.0006         |
| 2             | 1       | 2             | 1    | 0            | 1      | 4024.4790          | 0.0104         |
| 2             | 2       | 1             | 1    | 1            | 0      | 4804.1150          | 0.0026         |
| 2             | 2       | 0             | 1    | 1            | 1      | 5252.3820          | -0.0012        |
| 3             | 0       | 3             | 2    | 1            | 2      | 5757.0167          | 0.0056         |
| 3             | 1       | 3             | 2    | 0            | 2      | 5795.5364          | -0.0025        |
| 3             | 2       | 2             | 2    | 1            | 1      | 6621.4280          | -0.0078        |
| 3             | 3       | 1             | 2    | 2            | 0      | 7447.3350          | 0.0022         |
| 4             | 0       | 4             | 3    | 1            | 3      | 7589.9688          | -0.0011        |
| 4             | 1       | 4             | 3    | 0            | 3      | 7596.5770          | -0.0032        |
| $A_0$ [MHz]   |         | $B_0$ [MHz]   |      | $C_0$ [MHz]  |        | $N_{lines}$        | $r.m.s.$ [MHz] |
| 1298.4836(28) |         | 1177.1075(69) |      | 908.6617(17) |        | 10                 | 0.0048         |
| $ a_s $ [Å]   |         | $ b_s $ [Å]   |      | $ c_s $ [Å]  |        |                    |                |
| 0.3167(53)    |         | 0.5667(29)    |      | 1.7130(98)   |        |                    |                |



Table 8: Experimental transition frequencies and rotational constants for  $^{13}\text{C}7$  isotopologue of *anti*, *cis*-verbenol, and substitution coordinates of the substituted carbon atom.

| $J''$         | $K_a''$ | $K_c''$       | $J'$ | $K_a'$       | $K_c'$ | $\nu_{obs.}$ [MHz] | obs.-calc.     |
|---------------|---------|---------------|------|--------------|--------|--------------------|----------------|
| 2             | 0       | 2             | 1    | 1            | 1      | 3868.8743          | 0.0051         |
| 2             | 1       | 2             | 1    | 0            | 1      | 4029.5124          | -0.0156        |
| 2             | 2       | 1             | 1    | 1            | 0      | 4831.8297          | -0.0051        |
| 2             | 2       | 0             | 1    | 1            | 1      | 5289.9901          | -0.0035        |
| 3             | 0       | 3             | 2    | 1            | 2      | 5755.2141          | 0.0017         |
| 3             | 1       | 3             | 2    | 0            | 2      | 5795.8165          | -0.0029        |
| 3             | 2       | 2             | 2    | 1            | 1      | 6646.0290          | 0.0069         |
| 3             | 3       | 1             | 2    | 2            | 0      | 7496.2288          | 0.0040         |
| 4             | 0       | 4             | 3    | 1            | 3      | 7585.8463          | -0.0044        |
| 4             | 1       | 4             | 3    | 0            | 3      | 7592.9112          | 0.0066         |
| $A_0$ [MHz]   |         | $B_0$ [MHz]   |      | $C_0$ [MHz]  |        | $N_{lines}$        | $r.m.s.$ [MHz] |
| 1308.2470(28) |         | 1182.0453(69) |      | 907.0937(17) |        | 10                 | 0.0067         |
| $ a_s $ [Å]   |         | $ b_s $ [Å]   |      | $ c_s $ [Å]  |        |                    |                |
| 1.0653(16)    |         | 0.5095(33)    |      | 0.2951(57)   |        |                    |                |

Table 9: Experimental transition frequencies and rotational constants for  $^{13}\text{C}8$  isotopologue of *anti*, *cis*-verbenol, and substitution coordinates of the substituted carbon atom.

| $J''$         | $K_a''$ | $K_c''$      | $J'$ | $K_a'$       | $K_c'$ | $\nu_{obs.}$ [MHz] | obs.-calc.     |
|---------------|---------|--------------|------|--------------|--------|--------------------|----------------|
| 2             | 0       | 2            | 1    | 1            | 1      | 3812.3131          | -0.0019        |
| 2             | 1       | 2            | 1    | 0            | 1      | 3989.0766          | 0.0032         |
| 2             | 2       | 1            | 1    | 1            | 0      | 4803.4072          | 0.0047         |
| 2             | 2       | 0            | 1    | 1            | 1      |                    |                |
| 3             | 0       | 3            | 2    | 1            | 2      | 5681.6867          | 0.0051         |
| 3             | 1       | 3            | 2    | 0            | 2      | 5729.5688          | -0.0016        |
| 3             | 2       | 2            | 2    | 1            | 1      | 6594.3610          | 0.0040         |
| 3             | 3       | 1            | 2    | 2            | 0      | 7459.1383          | -0.0053        |
| 4             | 0       | 4            | 3    | 1            | 3      | 7491.8180          | -0.0022        |
| 4             | 1       | 4            | 3    | 0            | 3      | 7500.8113          | -0.0025        |
| $A_0$ [MHz]   |         | $B_0$ [MHz]  |      | $C_0$ [MHz]  |        | $N_{lines}$        | $r.m.s.$ [MHz] |
| 1302.6418(33) |         | 1166.013(14) |      | 895.4772(24) |        | 9                  | 0.0036         |
| $ a_s $ [Å]   |         | $ b_s $ [Å]  |      | $ c_s $ [Å]  |        |                    |                |
| 2.5639(79)    |         | 1.4349(15)   |      | 0.5068(41)   |        |                    |                |

Table 10: Experimental transition frequencies and rotational constants for  $^{13}\text{C}9$  isotopologue of *anti*, *cis*-verbenol, and substitution coordinates of the substituted carbon atom.

| $J''$         | $K_a''$ | $K_c''$       | $J'$ | $K_a'$       | $K_c'$ | $\nu_{obs.}$ [MHz] | obs.-calc.     |
|---------------|---------|---------------|------|--------------|--------|--------------------|----------------|
| 2             | 0       | 2             | 1    | 1            | 1      | 3822.6968          | -0.0026        |
| 2             | 1       | 2             | 1    | 0            | 1      | 3997.3013          | 0.0040         |
| 2             | 2       | 1             | 1    | 1            | 0      | 4811.2530          | 0.0100         |
| 2             | 2       | 0             | 1    | 1            | 1      | 5258.6485          | 0.0014         |
| 3             | 0       | 3             | 2    | 1            | 2      | 5695.4647          | 0.0010         |
| 3             | 1       | 3             | 2    | 0            | 2      | 5742.2835          | -0.0055        |
| 3             | 2       | 2             | 2    | 1            | 1      | 6606.3980          | -0.0072        |
| 3             | 3       | 1             | 2    | 2            | 0      | 7470.5182          | -0.0032        |
| 4             | 0       | 4             | 3    | 1            | 3      | 7509.4080          | -0.0080        |
| 4             | 1       | 4             | 3    | 0            | 3      | 7518.1227          | 0.0129         |
| $A_0$ [MHz]   |         | $B_0$ [MHz]   |      | $C_0$ [MHz]  |        | $N_{lines}$        | $r.m.s.$ [MHz] |
| 1304.5540(28) |         | 1169.2691(69) |      | 897.5811(17) |        | 10                 | 0.0067         |
| $ a_s $ [Å]   |         | $ b_s $ [Å]   |      | $ c_s $ [Å]  |        |                    |                |
| 2.3858(7)     |         | 1.2753(14)    |      | 0.131(13)    |        |                    |                |

Table 11: Experimental transition frequencies and rotational constants for  $^{13}\text{C}10$  isotopologue of *anti*, *cis*-verbenol, and substitution coordinates of the substituted carbon atom.

| $J''$         | $K_a''$ | $K_c''$       | $J'$ | $K_a'$       | $K_c'$ | $\nu_{obs.}$ [MHz] | obs.-calc.     |
|---------------|---------|---------------|------|--------------|--------|--------------------|----------------|
| 2             | 0       | 2             | 1    | 1            | 1      | 3863.3500          | -0.0073        |
| 2             | 1       | 2             | 1    | 0            | 1      | 4022.2648          | 0.0000         |
| 2             | 2       | 1             | 1    | 1            | 0      | 4803.9145          | 0.0070         |
| 2             | 2       | 0             | 1    | 1            | 1      | 5246.6353          | 0.0036         |
| 3             | 0       | 3             | 2    | 1            | 2      | 5750.2932          | 0.0016         |
| 3             | 1       | 3             | 2    | 0            | 2      | 5790.9836          | -0.0005        |
| 3             | 2       | 2             | 2    | 1            | 1      | 6619.6342          | 0.0050         |
| 3             | 3       | 1             | 2    | 2            | 0      | 7448.2650          | -0.0094        |
| 4             | 0       | 4             | 3    | 1            | 3      | 7582.4598          | -0.0054        |
| 4             | 1       | 4             | 3    | 0            | 3      | 7589.6443          | 0.0062         |
| $A_0$ [MHz]   |         | $B_0$ [MHz]   |      | $C_0$ [MHz]  |        | $N_{lines}$        | $r.m.s.$ [MHz] |
| 1298.6822(28) |         | 1174.2257(69) |      | 907.8608(17) |        | 10                 | 0.0054         |
| $ a_s $ [Å]   |         | $ b_s $ [Å]   |      | $ c_s $ [Å]  |        |                    |                |
| 0.9435(18)    |         | 0.124(13)     |      | 1.7875(9)    |        |                    |                |

Table 12: Experimental transition frequencies and rotational constants for OD isotopologue of *anti*, *cis*-verbenol, and substitution coordinates of the substituted carbon atom.

| $J''$         | $K_a''$ | $K_c''$       | $J'$ | $K_a'$       | $K_c'$ | $\nu_{obs.}$ [MHz] | obs.-calc.     |
|---------------|---------|---------------|------|--------------|--------|--------------------|----------------|
| 2             | 1       | 2             | 1    | 0            | 1      | 3992.0140          | 0.0057         |
| 2             | 2       | 0             | 1    | 1            | 1      | 5243.6980          | -0.0144        |
| 2             | 2       | 1             | 1    | 1            | 0      | 4765.6590          | 0.0043         |
| 3             | 0       | 3             | 2    | 1            | 2      | 5722.9710          | -0.0126        |
| 3             | 1       | 3             | 2    | 0            | 2      | 5752.0900          | -0.0042        |
| 4             | 1       | 3             | 3    | 2            | 2      | 8129.0470          | 0.0173         |
| 4             | 2       | 3             | 3    | 1            | 2      | 8273.3200          | 0.0222         |
| 4             | 3       | 2             | 3    | 2            | 1      | 9199.7370          | 0.0036         |
| 4             | 4       | 1             | 3    | 3            | 0      | 10015.6690         | -0.0057        |
| 5             | 0       | 5             | 4    | 1            | 4      | 9341.9030          | -0.0070        |
| 5             | 1       | 5             | 4    | 0            | 4      | 9342.4440          | -0.0066        |
| 5             | 1       | 4             | 4    | 2            | 3      | 9988.2820          | -0.0018        |
| 5             | 2       | 4             | 4    | 1            | 3      | 10018.6280         | -0.0028        |
| $A_0$ [MHz]   |         | $B_0$ [MHz]   |      | $C_0$ [MHz]  |        | $N_{lines}$        | $r.m.s.$ [MHz] |
| 1288.1195(20) |         | 1181.1713(47) |      | 901.2963(13) |        | 13                 | 0.0102         |
| $ a_s $ [Å]   |         | $ b_s $ [Å]   |      | $ c_s $ [Å]  |        |                    |                |
| 0.2483(63)    |         | 2.2041(7)     |      | 1.2359(13)   |        |                    |                |

Table 13: Comparison between the theoretical MP2/6-311++G(d,p) equilibrium coordinates and experimental Kraitchman's substitution coordinates of *anti*, *cis*-verbenol.

|     | $a_e$ [Å] | $r_e$<br>$b_e$ [Å] | $c_e$ [Å] | $ a_s $ [Å] | $r_s$<br>$ b_s $ [Å] | $ c_s $ [Å] |
|-----|-----------|--------------------|-----------|-------------|----------------------|-------------|
| C1  | -0.8928   | 0.5485             | -0.8126   | 0.8873(19)  | 0.5505(30)           | 0.8097(21)  |
| C2  | 0.2415    | 1.5396             | -0.5307   | 0.2671(62)  | 1.5278(11)           | 0.5274(32)  |
| C3  | 1.4697    | 0.7921             | -0.0645   | 1.4865(11)  | 0.7513(22)           | 0.083(20)   |
| C4  | 1.4413    | -0.5553            | 0.0292    | 1.4273(12)  | 0.5744(29)           | 0.024(68)   |
| C5  | 0.1555    | -1.2408            | -0.3789   | 0.047(36)   | 1.2433(13)           | 0.3815(44)  |
| C6  | -0.3093   | -0.5789            | -1.7098   | 0.3167(53)  | 0.5667(29)           | 1.7130(98)  |
| C7  | -1.0579   | -0.5286            | 0.3124    | 1.0653(16)  | 0.5095(33)           | 0.2951(57)  |
| C8  | 2.5908    | -1.3922            | 0.5088    | 2.5639(79)  | 1.4349(15)           | 0.5068(41)  |
| C9  | -2.3608   | -1.3131            | 0.1346    | 2.3858(7)   | 1.2753(14)           | 0.131(13)   |
| C10 | -0.9394   | -0.1487            | 1.7866    | 0.9435(18)  | 0.123(13)            | 1.7875(9)   |
| H12 | -0.2293   | 2.1698             | 1.2456    | 0.2483(63)  | 2.2041(7)            | 1.2359(13)  |

Table 14: Theoretical MP2/6-311++G(d,p) equilibrium structure of the three conformers of *cis*-verbenol in the principal axis system of coordinates.

|     | <i>anti</i> |           |           | <i>gauche'</i> |           |           | <i>gauche</i> |           |           |
|-----|-------------|-----------|-----------|----------------|-----------|-----------|---------------|-----------|-----------|
|     | $a_e$ [Å]   | $b_e$ [Å] | $c_e$ [Å] | $a_e$ [Å]      | $b_e$ [Å] | $c_e$ [Å] | $a_e$ [Å]     | $b_e$ [Å] | $c_e$ [Å] |
| C1  | -0.8928     | 0.5485    | -0.8126   | -0.9180        | 0.4904    | -0.8230   | 0.9017        | -0.5326   | -0.8186   |
| C2  | 0.2415      | 1.5396    | -0.5307   | 0.1552         | 1.5406    | -0.5529   | -0.2323       | -1.5270   | -0.5520   |
| C3  | 1.4697      | 0.7921    | -0.0645   | 1.4252         | 0.8716    | -0.0784   | -1.4602       | -0.7973   | -0.0722   |
| C4  | 1.4413      | -0.5553   | 0.0292    | 1.4755         | -0.4730   | 0.0304    | -1.4417       | 0.5485    | 0.0257    |
| C5  | 0.1555      | -1.2408   | -0.3789   | 0.2298         | -1.2318   | -0.3679   | -0.1573       | 1.2427    | -0.3699   |
| C6  | -0.3093     | -0.5789   | -1.7098   | -0.2723        | -0.6131   | -1.7060   | 0.3183        | 0.6012    | -1.7070   |
| C7  | -1.0579     | -0.5286   | 0.3124    | -1.0188        | -0.5749   | 0.3195    | 1.0539        | 0.5252    | 0.3233    |
| C8  | 2.5908      | -1.3922   | 0.5088    | 2.6681         | -1.2360   | 0.5268    | -2.5960       | 1.3732    | 0.5136    |
| C9  | -2.3608     | -1.3131   | 0.1346    | -2.2746        | -1.4358   | 0.1548    | 2.3498        | 1.3257    | 0.1645    |
| C10 | -0.9394     | -0.1487   | 1.7866    | -0.9177        | -0.1557   | 1.7816    | 0.9256        | 0.1087    | 1.7843    |
| O11 | -0.1413     | 2.5788    | 0.3793    | -0.3715        | 2.4675    | 0.4114    | 0.1088        | -2.5092   | 0.4378    |
| H12 | -0.2293     | 2.1698    | 1.2456    | 0.3002         | 3.1427    | 0.5536    | 0.7740        | -3.0834   | 0.0437    |
| H13 | 0.4882      | -0.2925   | -2.4028   | 0.5057         | -0.2942   | -2.4072   | -0.4725       | 0.3196    | -2.4099   |
| H14 | -1.7944     | 1.0804    | -1.1379   | -1.8473        | 0.9677    | -1.1546   | 1.8113        | -1.0517   | -1.1510   |
| H15 | 0.4641      | 2.0782    | -1.4611   | 0.3490         | 2.0833    | -1.4930   | -0.4661       | -2.0446   | -1.4979   |
| H16 | 2.3559      | 1.3687    | 0.1983    | 2.2837         | 1.4941    | 0.1776    | -2.3357       | -1.3867   | 0.1949    |
| H17 | 3.4600      | -0.7749   | 0.7539    | 3.5022         | -0.5680   | 0.7617    | -3.4612       | 0.7478    | 0.7526    |
| H18 | 2.3019      | -1.9616   | 1.4013    | 2.4064         | -1.8008   | 1.4303    | -2.3088       | 1.9324    | 1.4128    |
| H19 | 2.8825      | -2.1213   | -0.2569   | 3.0008         | -1.9638   | -0.2232   | -2.8927       | 2.1098    | -0.2431   |
| H20 | -1.0758     | -1.1458   | -2.2406   | -1.0096        | -1.2277   | -2.2245   | 1.0865        | 1.1783    | -2.2242   |
| H21 | 0.2154      | -2.3337   | -0.3143   | 0.3496         | -2.3189   | -0.2907   | -0.2206       | 2.3346    | -0.2930   |
| H22 | -3.2102     | -0.7011   | 0.4615    | -3.1577        | -0.8628   | 0.4619    | 3.2064        | 0.7077    | 0.4595    |
| H23 | -2.5432     | -1.6132   | -0.8999   | -2.4348        | -1.7764   | -0.8713   | 2.5215        | 1.6736    | -0.8573   |
| H24 | -2.3406     | -2.2189   | 0.7526    | -2.2072        | -2.3205   | 0.7993    | 2.3279        | 2.2033    | 0.8218    |
| H25 | -1.7460     | 0.5379    | 2.0725    | -1.7771        | 0.4671    | 2.0530    | 1.7780        | -0.5174   | 2.0715    |
| H26 | -1.0406     | -1.0477   | 2.4077    | -0.9296        | -1.0511   | 2.4172    | 0.9366        | 1.0053    | 2.4182    |
| H27 | 0.0234      | 0.3079    | 2.0313    | -0.0155        | 0.4167    | 1.9953    | 0.0167        | -0.4570   | 1.9869    |

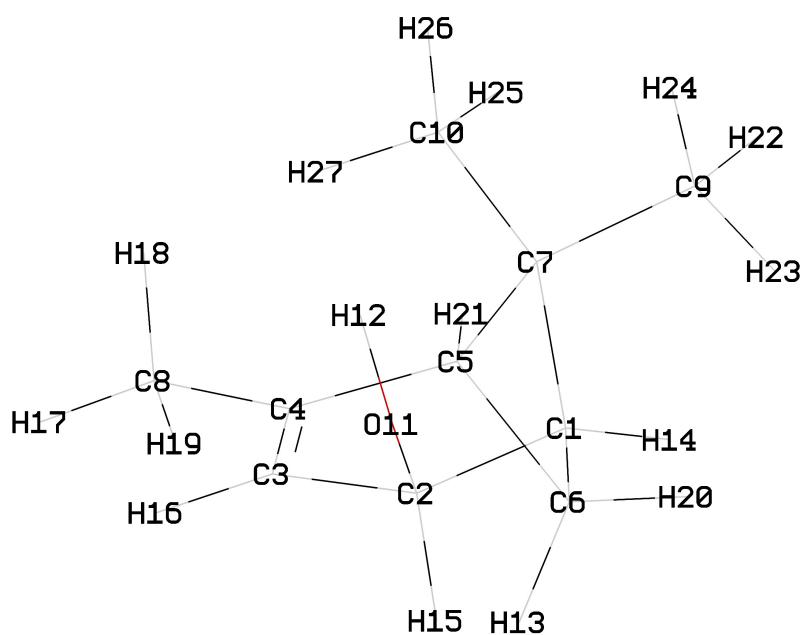

Figure 1: Sketch and numbering of the atoms of the *anti* conformer of *cis*-verbenol, as given in Table 14.

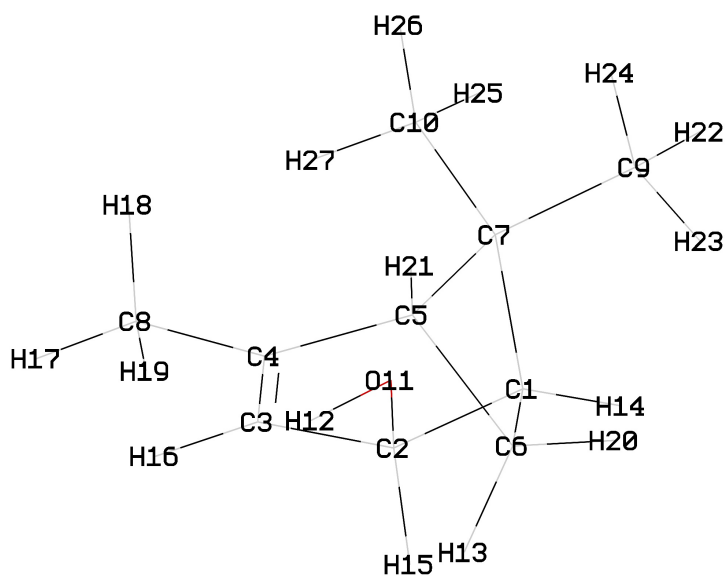

Figure 2: Sketch and numbering of the atoms of the *gauche'* conformer of *cis*-verbenol, as given in Table 14.

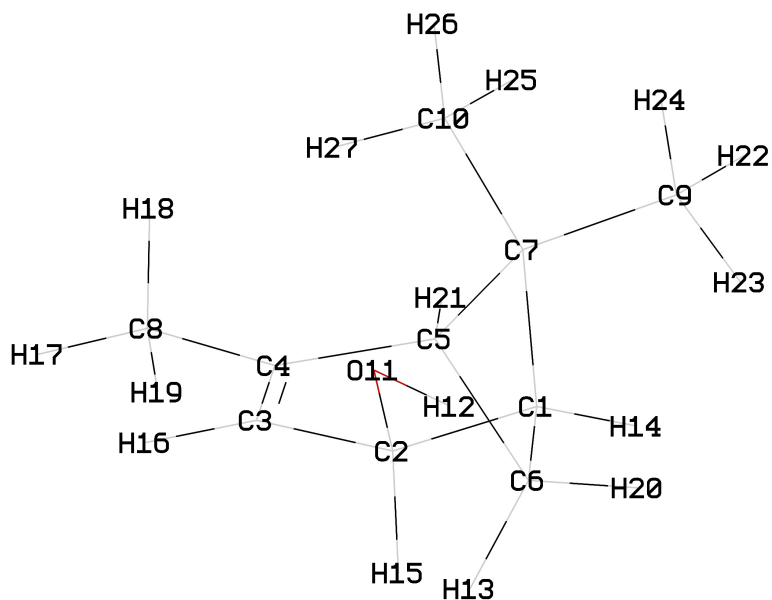

Figure 3: Sketch and numbering of the atoms of the *gauche* conformer of *cis*-verbenol, as given in Table 14.



Table 15: Experimental transition frequencies of *anti*, *s-cis*-verbenol-water molecular complex.

| $J''$ | $K_a''$ | $K_c''$ | $J'$ | $K_a'$ | $K_c'$ | $\nu_{obs.}$ [MHz] | obs.-calc. |
|-------|---------|---------|------|--------|--------|--------------------|------------|
| 3     | 0       | 3       | 2    | 0      | 2      | 3949.243           | -0.002     |
| 3     | 1       | 3       | 2    | 1      | 2      | 3826.772           | 0.000      |
| 3     | 1       | 2       | 2    | 1      | 1      | 4206.793           | 0.005      |
| 4     | 0       | 4       | 3    | 0      | 3      | 5189.976           | -0.002     |
| 4     | 1       | 4       | 3    | 1      | 3      | 5082.313           | 0.004      |
| 4     | 1       | 3       | 3    | 1      | 2      | 5578.867           | 0.006      |
| 5     | 0       | 5       | 4    | 0      | 4      | 6402.210           | -0.004     |
| 5     | 1       | 5       | 4    | 1      | 4      | 6325.979           | 0.001      |
| 5     | 1       | 4       | 4    | 1      | 3      | 6919.015           | -0.001     |
| 5     | 2       | 4       | 4    | 2      | 3      | 6670.061           | -0.001     |
| 5     | 2       | 3       | 4    | 2      | 2      | 6983.217           | 0.011      |
| 5     | 3       | 3       | 4    | 3      | 2      | 6769.215           | -0.011     |
| 5     | 3       | 2       | 4    | 3      | 1      | 6813.231           | -0.011     |
| 6     | 0       | 6       | 5    | 0      | 5      | 7605.594           | -0.002     |
| 6     | 1       | 6       | 5    | 1      | 5      | 7559.616           | 0.009      |
| 6     | 2       | 5       | 5    | 2      | 4      | 7966.963           | -0.001     |

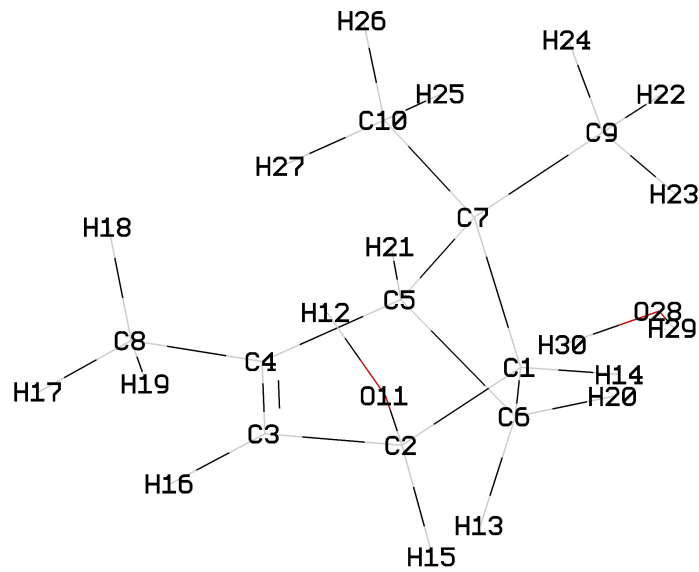

Figure 4: Sketch and numbering of the atoms of the observed water complex of *cis*-verbenol (AD1), as given in Table 16.

Table 16: Theoretical MP2/6-311++G(d,p) equilibrium structure of the three conformers of *anti,cis*-verbenol...water complex in the principal axis system of coordinates.

|     | AA        |           |           | AD1       |           |           | AD2       |           |           |
|-----|-----------|-----------|-----------|-----------|-----------|-----------|-----------|-----------|-----------|
|     | $a_e$ [Å] | $b_e$ [Å] | $c_e$ [Å] | $a_e$ [Å] | $b_e$ [Å] | $c_e$ [Å] | $a_e$ [Å] | $b_e$ [Å] | $c_e$ [Å] |
| C1  | 0.7238    | 0.9217    | 0.9771    | -0.5696   | 0.2426    | 0.8331    | 0.5306    | 1.0111    | 0.8406    |
| C2  | -0.4994   | 0.1283    | 1.4529    | -0.4008   | -1.2544   | 0.5634    | -0.9104   | 0.5394    | 0.6414    |
| C3  | -0.5301   | -1.2179   | 0.7676    | 1.0009    | -1.5438   | 0.0880    | -0.9322   | -0.8890   | 0.1515    |
| C4  | 0.4540    | -1.5571   | -0.0932   | 1.8838    | -0.5288   | -0.0408   | 0.2338    | -1.5486   | -0.0225   |
| C5  | 1.5623    | -0.5471   | -0.2967   | 1.4037    | 0.8509    | 0.3525    | 1.5034    | -0.7970   | 0.3162    |
| C6  | 1.9579    | -0.0142   | 1.1119    | 0.6403    | 0.6909    | 1.7007    | 1.2568    | -0.0802   | 1.6767    |
| C7  | 0.9340    | 0.8633    | -0.5717   | 0.0131    | 1.1325    | -0.3153   | 1.4681    | 0.6201    | -0.3527   |
| C8  | 0.4984    | -2.8497   | -0.8542   | 3.2903    | -0.6961   | -0.5348   | 0.3350    | -2.9606   | -0.5198   |
| C9  | 1.9863    | 1.8811    | -1.0207   | -0.4292   | 2.5887    | -0.1456   | 2.8158    | 1.3392    | -0.2486   |
| C10 | -0.2545   | 0.9638    | -1.5227   | -0.1903   | 0.7551    | -1.7810   | 0.9878    | 0.7338    | -1.7980   |
| O11 | -1.7211   | 0.8523    | 1.2942    | -1.3868   | -1.7581   | -0.3682   | -1.6610   | 1.4187    | -0.2256   |
| H12 | -2.1179   | 0.6069    | 0.4475    | -1.0544   | -1.5678   | -1.2524   | -1.2517   | 1.3665    | -1.0959   |
| H13 | 1.9312    | -0.7488   | 1.9234    | 1.0517    | -0.0472   | 2.3967    | 0.6486    | -0.6301   | 2.4017    |
| H14 | 0.7448    | 1.9098    | 1.4518    | -1.5845   | 0.4671    | 1.1758    | 0.5543    | 2.0523    | 1.1828    |
| H15 | -0.3954   | -0.0145   | 2.5385    | -0.6121   | -1.8038   | 1.4898    | -1.4411   | 0.6152    | 1.5988    |
| H16 | -1.3652   | -1.8861   | 0.9758    | 1.2672    | -2.5728   | -0.1516   | -1.8995   | -1.3482   | -0.0466   |
| H17 | -0.3527   | -3.4900   | -0.6039   | 3.5119    | -1.7414   | -0.7697   | -0.6539   | -3.3887   | -0.7071   |
| H18 | 0.4847    | -2.6557   | -1.9343   | 3.4505    | -0.0912   | -1.4361   | 0.9160    | -2.9971   | -1.4500   |
| H19 | 1.4250    | -3.3953   | -0.6371   | 4.0061    | -0.3454   | 0.2186    | 0.8582    | -3.5893   | 0.2109    |
| H20 | 2.9078    | 0.5228    | 1.1295    | 0.4632    | 1.6328    | 2.2218    | 2.1666    | 0.2845    | 2.1561    |
| H21 | 2.3454    | -0.9044   | -0.9763   | 2.1853    | 1.6146    | 0.2627    | 2.4067    | -1.4041   | 0.1853    |
| H22 | 1.5500    | 2.8876    | -1.0216   | -1.4780   | 2.6887    | -0.4483   | 3.2325    | 1.3254    | 0.7612    |
| H23 | 2.8695    | 1.9000    | -0.3775   | -0.3423   | 2.9464    | 0.8830    | 2.7028    | 2.3874    | -0.5510   |
| H24 | 2.3149    | 1.6557    | -2.0428   | 0.1757    | 3.2425    | -0.7856   | 3.5432    | 0.8708    | -0.9225   |
| H25 | -0.7468   | 1.9372    | -1.4079   | -1.2593   | 0.7488    | -2.0255   | 0.8012    | 1.7834    | -2.0601   |
| H26 | 0.0983    | 0.8845    | -2.5595   | 0.2919    | 1.5029    | -2.4232   | 1.7685    | 0.3661    | -2.4755   |
| H27 | -0.9944   | 0.1791    | -1.3565   | 0.2440    | -0.2162   | -2.0354   | 0.0868    | 0.1458    | -1.9944   |
| O28 | -3.5692   | 0.1939    | -0.8488   | -3.7657   | -0.2266   | 0.0141    | -4.1944   | 0.1502    | -0.1144   |
| H29 | -4.3967   | 0.3070    | -0.3723   | -4.5775   | -0.7386   | -0.1302   | -3.4188   | 0.7274    | -0.1883   |
| H30 | -3.6951   | 0.6997    | -1.6564   | -3.0544   | -0.8647   | -0.1466   | -4.8764   | 0.7256    | 0.2375    |

Table 17: Theoretical MP2/6-311++G(d,p) equilibrium structure of the two conformers of *gauche*, *cis*-verbenol...water complex in the principal axis system of coordinates.

|     | GA        |           |           | GD        |           |           |
|-----|-----------|-----------|-----------|-----------|-----------|-----------|
|     | $a_e$ [Å] | $b_e$ [Å] | $c_e$ [Å] | $a_e$ [Å] | $b_e$ [Å] | $c_e$ [Å] |
| C1  | 0.4905    | -0.5431   | 0.6777    | -0.8056   | -0.9547   | 0.8936    |
| C2  | 0.7826    | 0.9220    | 0.3313    | 0.6350    | -0.5111   | 1.1523    |
| C3  | -0.5037   | 1.6410    | 0.0103    | 0.8618    | 0.8789    | 0.6181    |
| C4  | -1.6784   | 0.9815    | 0.0855    | -0.1654   | 1.5456    | 0.0504    |
| C5  | -1.6175   | -0.4693   | 0.5100    | -1.4967   | 0.8303    | -0.0075   |
| C6  | -0.6529   | -0.5515   | 1.7299    | -1.7323   | 0.1892    | 1.3923    |
| C7  | -0.5108   | -1.2063   | -0.3236   | -1.2808   | -0.6228   | -0.5592   |
| C8  | -3.0104   | 1.5896    | -0.2428   | -0.0506   | 2.9237    | -0.5304   |
| C9  | -0.5715   | -2.7233   | -0.1225   | -2.6110   | -1.3131   | -0.8738   |
| C10 | -0.4066   | -0.9265   | -1.8187   | -0.3442   | -0.8284   | -1.7449   |
| O11 | 1.6662    | 1.0638    | -0.7817   | 1.5952    | -1.3910   | 0.5254    |
| H12 | 2.5373    | 0.7721    | -0.4775   | 1.6235    | -2.2043   | 1.0410    |
| H13 | -0.6894   | 0.2940    | 2.4247    | -1.3806   | 0.7712    | 2.2502    |
| H14 | 1.4208    | -1.0826   | 0.8984    | -0.9778   | -1.9751   | 1.2623    |
| H15 | 1.2450    | 1.3912    | 1.2175    | 0.8192    | -0.5216   | 2.2386    |
| H16 | -0.4443   | 2.6844    | -0.2957   | 1.8582    | 1.3083    | 0.7021    |
| H17 | -2.9103   | 2.6429    | -0.5214   | 0.9599    | 3.3246    | -0.4105   |
| H18 | -3.4793   | 1.0504    | -1.0756   | -0.2961   | 2.9049    | -1.5997   |
| H19 | -3.6924   | 1.5160    | 0.6134    | -0.7610   | 3.6067    | -0.0487   |
| H20 | -0.7211   | -1.4897   | 2.2836    | -2.7595   | -0.1375   | 1.5612    |
| H21 | -2.6074   | -0.9367   | 0.5770    | -2.2898   | 1.4388    | -0.4574   |
| H22 | 0.3336    | -3.1884   | -0.5323   | -2.4415   | -2.3817   | -1.0532   |
| H23 | -0.6552   | -3.0174   | 0.9270    | -3.3474   | -1.2191   | -0.0717   |
| H24 | -1.4334   | -3.1370   | -0.6603   | -3.0461   | -0.8852   | -1.7849   |
| H25 | 0.5024    | -1.3869   | -2.2229   | -0.1461   | -1.8966   | -1.8890   |
| H26 | -1.2691   | -1.3728   | -2.3321   | -0.8242   | -0.4474   | -2.6560   |
| H27 | -0.3670   | 0.1377    | -2.0490   | 0.6139    | -0.3245   | -1.6181   |
| O28 | 4.2572    | 0.2004    | 0.2234    | 3.9855    | -0.2388   | -0.5511   |
| H29 | 4.7207    | -0.5053   | -0.2357   | 3.1877    | -0.6677   | -0.2091   |
| H30 | 4.9289    | 0.8755    | 0.3532    | 3.8667    | -0.2787   | -1.5021   |

Table 18: Theoretical MP2/6-311++G(d,p) equilibrium structure of the two conformers of *gauche'*, *cis*-verbenol...water complex in the principal axis system of coordinates.

|     | G'A       |           |           | G'D       |           |           |
|-----|-----------|-----------|-----------|-----------|-----------|-----------|
|     | $a_e$ [Å] | $b_e$ [Å] | $c_e$ [Å] | $a_e$ [Å] | $b_e$ [Å] | $c_e$ [Å] |
| C1  | 0.5731    | -1.0035   | -0.8652   | 0.5221    | -0.1262   | 0.9576    |
| C2  | -0.8573   | -0.4766   | -0.7832   | 0.1929    | 1.3382    | 0.6898    |
| C3  | -0.8525   | 0.9512    | -0.2806   | -1.1752   | 1.4607    | 0.0630    |
| C4  | 0.3187    | 1.5594    | 0.0035    | -1.9105   | 0.3496    | -0.1560   |
| C5  | 1.5760    | 0.7531    | -0.2341   | -1.3037   | -0.9652   | 0.2797    |
| C6  | 1.4184    | 0.0595    | -1.6195   | -0.7004   | -0.7382   | 1.6964    |
| C7  | 1.4113    | -0.6673   | 0.4130    | 0.1684    | -1.0557   | -0.2545   |
| C8  | 0.4376    | 2.9535    | 0.5463    | -3.2627   | 0.3501    | -0.8053   |
| C9  | 2.7325    | -1.4417   | 0.4224    | 0.7719    | -2.4489   | -0.0554   |
| C10 | 0.7860    | -0.7761   | 1.7990    | 0.4482    | -0.6232   | -1.6900   |
| O11 | -1.6109   | -1.3502   | 0.0624    | 1.2275    | 1.8791    | -0.1672   |
| H12 | -2.5105   | -0.9953   | 0.0977    | 1.0764    | 2.8268    | -0.2478   |
| H13 | 0.9044    | 0.6433    | -2.3902   | -1.2664   | -0.0738   | 2.3576    |
| H14 | 0.5799    | -2.0423   | -1.2154   | 1.5180    | -0.2313   | 1.3996    |
| H15 | -1.2878   | -0.5038   | -1.7993   | 0.2252    | 1.8841    | 1.6459    |
| H16 | -1.8095   | 1.4560    | -0.1464   | -1.5444   | 2.4502    | -0.2095   |
| H17 | -0.5438   | 3.4261    | 0.6515    | -3.5899   | 1.3645    | -1.0522   |
| H18 | 0.9264    | 2.9384    | 1.5288    | -3.2383   | -0.2449   | -1.7268   |
| H19 | 1.0574    | 3.5746    | -0.1121   | -4.0079   | -0.1094   | -0.1447   |
| H20 | 2.3514    | -0.3417   | -2.0187   | -0.4537   | -1.6619   | 2.2214    |
| H21 | 2.4919    | 1.3158    | -0.0166   | -1.9705   | -1.8188   | 0.1095    |
| H22 | 2.5445    | -2.4898   | 0.6852    | 1.8539    | -2.4004   | -0.2221   |
| H23 | 3.2510    | -1.4242   | -0.5397   | 0.6003    | -2.8561   | 0.9444    |
| H24 | 3.4066    | -1.0212   | 1.1787    | 0.3426    | -3.1475   | -0.7839   |
| H25 | 0.5510    | -1.8225   | 2.0225    | 1.5281    | -0.6134   | -1.8696   |
| H26 | 1.5027    | -0.4170   | 2.5501    | -0.0054   | -1.3514   | -2.3759   |
| H27 | -0.1378   | -0.2052   | 1.8889    | 0.0535    | 0.3664    | -1.9208   |
| O28 | -4.2786   | -0.1764   | 0.1873    | 3.5668    | 0.2224    | -0.2047   |
| H29 | -5.0117   | -0.5896   | -0.2771   | 2.8677    | 0.8909    | -0.2553   |
| H30 | -4.6166   | -0.0329   | 1.0756    | 4.3262    | 0.6519    | -0.6043   |
